# Supplementary material for: Gout in primary care: Can we improve patient outcomes?
Source: PubMed Central journal article supplement — BMJ Qual Improv Rep. 2017 Apr 25;6(1):u210130.w4918. doi: 10.1136/bmjquality.u210130.w4918 (PMC5411725; doi:10.1136/bmjquality.u210130.w4918), 2017-04-25
Supplement: bmjqir.u210130.w4918supp.pdf [file bmjqir.u210130.w4918supp.pdf]

## Gout in primary care: Can we improve patient outcomes?

### Tables

Table 3 Uric acid levels

| Time period                    | Uric acid level |
|--------------------------------|-----------------|
| Baseline Jan 14-Dec 14         | 0.37            |
| Completion improvement cycle 2 | 0.34            |
| Completion improvement cycle 3 | 0.3             |

Table 1 Number of patients experiencing more than one flare of gout

| Time period            | No of patients experiencing 1+ flares of gout | Percentage |
|------------------------|-----------------------------------------------|------------|
| Baseline Jan 14-Dec 14 | 25                                            | 22         |
| April-September 15     | 15                                            | 13         |
| Oct 15 - March 16      | 5                                             | 4          |
|                        |                                               |            |

Table 2 Number of GP consultations for gout

| Time period            | No of GP appointments for gout |
|------------------------|--------------------------------|
| Baseline Jan 14-Dec 14 | 115                            |
| April-September 15     | 20                             |
| Oct 15 - March 16      | 7                              |
|                        |                                |

Table 4 Collection of full complement of prescriptions

| Time period            | Collection of full complement of prescriptions (number of patients) | Percentage |
|------------------------|---------------------------------------------------------------------|------------|
| Baseline Jan 14-Dec 14 | 73                                                                  | 63         |

|                         |     |     |
|-------------------------|-----|-----|
| Oct 15 - March 16       | 105 | 91  |
| April - June 16         | 85  | 74  |
| Completion PDSA cycle 1 | 103 | 90  |
| Completion PDSA cycle 2 | 115 | 100 |
